# Supplementary material for: Short-Term Use of Serotonin Reuptake Inhibitors and Risk of Upper Gastrointestinal Bleeding
Source: Atypon-hosted journal article supplement (doi:10.1176/appi.ajp.2013.12111467), 2013-09-13

**TABLE S1. ICD-9 CM codes for upper gastrointestinal bleeding and co-morbidities**

| <b>Disease</b>                  | <b>Definition</b>                                                                                                                                                                                |
|---------------------------------|--------------------------------------------------------------------------------------------------------------------------------------------------------------------------------------------------|
| Upper gastrointestinal bleeding | 530.21, 530.7, 530.82, 531.0X, 531.2X, 531.4X, 531.6X, 532.0X, 532.2X, 532.4X, 532.6X, 533.0X, 533.2X, 533.4X, 533.6X, 534.0X, 534.2X, 534.4X, 534.6X, 535.01, 535.11, 535.21, 535.31, or 535.41 |
| Depression                      | 296.2x, 296.3x, 300.4, 311                                                                                                                                                                       |
| Schizophrenia                   | 295                                                                                                                                                                                              |
| Anxiety                         | 300                                                                                                                                                                                              |
| Alcohol related disease         | V11.3, 291. 303, 305, 357.5, 425.5, 535.5, 571.0, 571.1, 571.2, 571.3, 790.3, 980.0                                                                                                              |
| Cerebral vascular disease       | 430-434, 436                                                                                                                                                                                     |
| Myocardial infarction           | 410                                                                                                                                                                                              |
| Heart failure                   | 428                                                                                                                                                                                              |
| Chronic pulmonary disease       | 490-496, 500-508                                                                                                                                                                                 |
| Diabetes mellitus               | 250                                                                                                                                                                                              |
| Hypertension                    | 401.x-405.x                                                                                                                                                                                      |
| Dyslipidemia                    | 272.0, 272.1, 272.2, 272.4                                                                                                                                                                       |
| Arrhythmia                      | 427.x, 785.0                                                                                                                                                                                     |
| Chronic renal disease           | 585, V45.1, V56.0, V56.8                                                                                                                                                                         |
| Chronic liver disease           | 571                                                                                                                                                                                              |
| Malignancy                      | 140-208                                                                                                                                                                                          |

**TABLE S2. Drug category and medication names used in this study**

| <b>Drug Category (Anatomical Therapeutic Chemical Classification)</b>    | <b>Medication Name</b>                                                                                                                                                                                                                                                                                    |
|--------------------------------------------------------------------------|-----------------------------------------------------------------------------------------------------------------------------------------------------------------------------------------------------------------------------------------------------------------------------------------------------------|
| Selective serotonin reuptake inhibitors (N06AB)                          | Fluoxetine, citalopram, paroxetine, setraline, fluvoxamine, escitalopram                                                                                                                                                                                                                                  |
| Tricyclic antidepressants (N06AA)                                        | Imipramine, clomipramine, amitriptyline, doxepin, dothiepin, maprotiline                                                                                                                                                                                                                                  |
| Monoamine oxidase inhibitor (N06AG)                                      | Moclobemide                                                                                                                                                                                                                                                                                               |
| Serotonin norepinephrine reuptake inhibitors (N06AX16, N06AX17, N06AX21) | Venlafaxine, milnacipran, duloxetine                                                                                                                                                                                                                                                                      |
| Other antidepressants (N06AX)                                            | Trazodone, mirtazapine, bupropion                                                                                                                                                                                                                                                                         |
| Proton pump inhibitors (A02BC)                                           | Esomeprazole, lansoprazole, omeprazole, pantoprazole, rabeprazole                                                                                                                                                                                                                                         |
| Histamine-2 receptor blockers (A02BA)                                    | Cimetidine, famotidine, nizatidine, ranitidine, roxatidine                                                                                                                                                                                                                                                |
| Vitamin K antagonist (B01AA)                                             | Warfarin sodium,                                                                                                                                                                                                                                                                                          |
| Steroids (H02AA & H02AB)                                                 | Betamethasone, dexamethasone, methylprednisolone, paramethasone, prednisolone, hydrocortisone, cortisone, aldosterone, fludrocortisone                                                                                                                                                                    |
| Aspirin (B01AC06)                                                        | Aspirin                                                                                                                                                                                                                                                                                                   |
| Clopidogrel (B01AC04)                                                    | Clopidogrel                                                                                                                                                                                                                                                                                               |
| Nonsteroidal anti-inflammatory drugs (M01A)                              | Celecoxib, rofecoxib, diclofenac potassium, diclofenac sodium, etoricoxib, fenbufen, fenoprofen, flufenamic acid, flubiprofen, ibuprofen, ketoprofen, mefenamic acid, nabumetone, naproxen, naproxen sodium, niflumic acid, phenylbutazone, sulindac, tilaprofenic acid, tolfenamic acid, tolemtin sodium |
| Benzodiazepines (N05CD)                                                  | Brotizolam, estazolam, flunitrazepam, flurazepam, lormetazepam, midazolam, nitrazepam, triazolam                                                                                                                                                                                                          |
| Non-benzodiazepines hypnotics (N05CF)                                    | Zopiclone, zolpidem, zaleplon                                                                                                                                                                                                                                                                             |

**FIGURE S1.** The risk of upper gastrointestinal bleeding based on the affinity of the antidepressants to the serotonin transporter. The antidepressants were divided into 3 groups as follows: high (<1 nmol/L, including fluoxetine, paroxetine, sertraline, clomipramine, and duloxetine), intermediate (1–10 nmol/L, including citalopram, fluvoxamine, escitalopram, imipramine, amitriptyline, venlafaxine, and milnacipran), and low affinity (>10 nmol/L, including doxepin, dothiepin, maprotiline, moclobemide, mianserin, trazodone, mirtazapine, and bupropion).

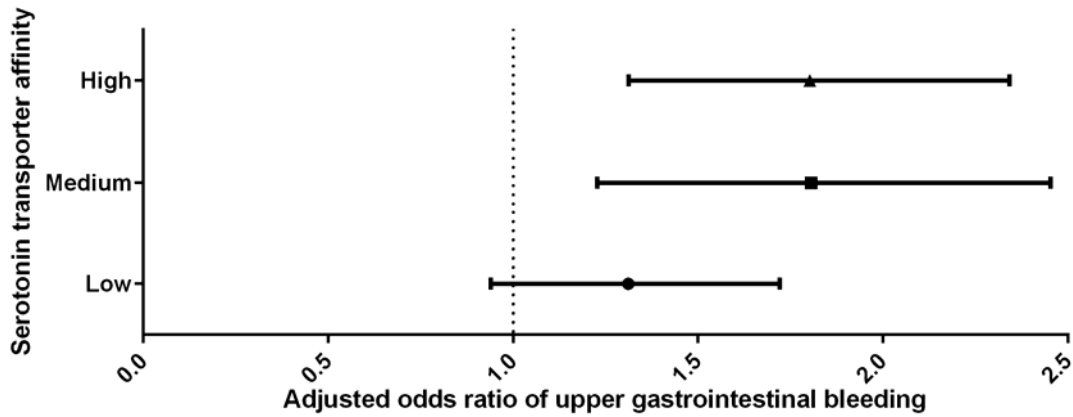

Supplement: 54_ds001.pdf [file 54_ds001.pdf]
